# Supplementary material for: The Importance of Trust in the Adoption and Use of Intelligent Assistive Technology by Older Adults to Support Aging in Place: Scoping Review Protocol
Source: PubMed Central journal article supplement (PMC5691240; doi:10.2196/resprot.8772), 2017-11-02
Supplement: resprot_v6i11e218_app1.pdf [file resprot_v6i11e218_app1.pdf]

**Subject:** RE: SSHRC KSG – feedback from competition  
**From:** "Conlon,Rachel" <Rachel.Conlon@sshrc-crsh.gc.ca>  
**Date:** 2017-05-30, 13:43  
**To:** "rbooth5@uwo.ca" <rbooth5@uwo.ca>  
**CC:** Knowledge Synthesis Grant <ksggl-sscgl@sshrc-crsh.gc.ca>

Dear Richard,

While we don't collect written comments from the merit reviewers, I can provide you with your average scores in the competition. Each score is out of six.

Challenge 4.50/6  
Feasibility 4.80/6  
Capability 5.15/6

For a total score of 14.36.

The last funded application received a score of 14.19

I hope this helps,

Sincerely,

**Rachel Conlon**

**Senior Program Officer/Agente de programme principale**  
Office of the Associate Vice-President. Future Challenges  
Bureau de la vice-présidente adjointe, Défis de demain  
Social Sciences and Humanities Research Council of Canada  
Conseil de recherches en sciences humaines du Canada  
350 Albert Street | 350, rue Albert, Ottawa, ON K1P 6G4  
**E | C :** [rachel.conlon@sshrc-crsh.gc.ca](mailto:rachel.conlon@sshrc-crsh.gc.ca)  
**T :** 613.944.5327 **F | T :** 613.943.1329  
[www.sshrc-crsh.gc.ca](http://www.sshrc-crsh.gc.ca)

*[Stay Connected](#)*

*[Restez branchés](#)*

---

**From:** Richard Booth [mailto:rbooth6@uwo.ca]  
**Sent:** Tuesday, May 30, 2017 12:44 PM  
**To:** Conlon,Rachel  
**Subject:** SSHRC KSG - feedback from competition

Hello Rachel,

I hope this message finds you well. I am one of the current KSG holders and enjoyed the SSHRC event May 18th in Ottawa, and pulled your email address from a message you sent
